# Supplementary material for: Hydrogen bonding of water confined in zeolites and their zeolitic imidazolate framework counterparts
Source: Royal Society of Chemistry journal article supplement (doi:10.1039/c4ra01508h), 2014-06-23

# Hydrogen bonding of water confined in zeolites and their Zeolitic Imidazolate Framework counterparts

S. Calero and P. Gómez-Álvarez\*

\* E-mail: pgomalv1@upo.es

<sup>a</sup> Department of Physical, Chemical, and Natural Systems, University Pablo de Olavide, Ctra. Utrera km 1, 41013 Seville, Spain.

**Electronic Supporting Information**

Fig. S1 Zeolite and ZIF forms of FAU topology.

---

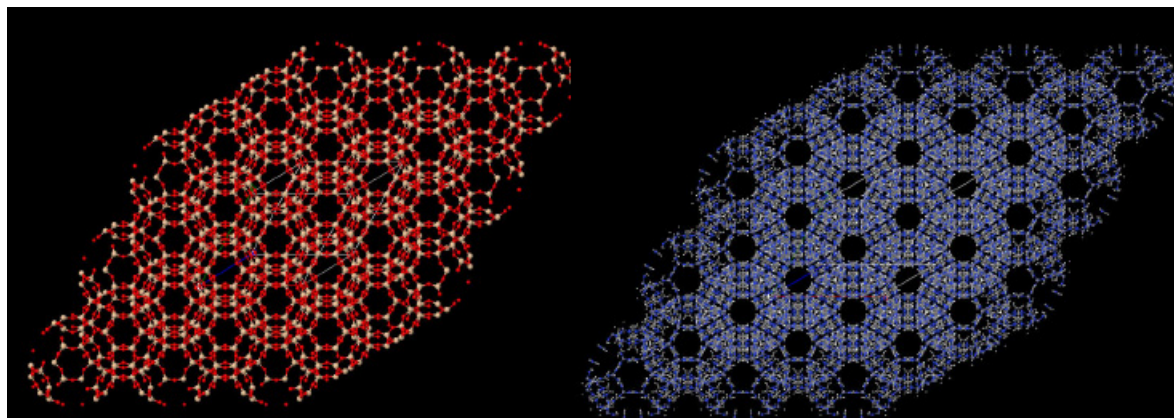

Fig. S2 Zeolite and ZIF forms of FER topology.

---

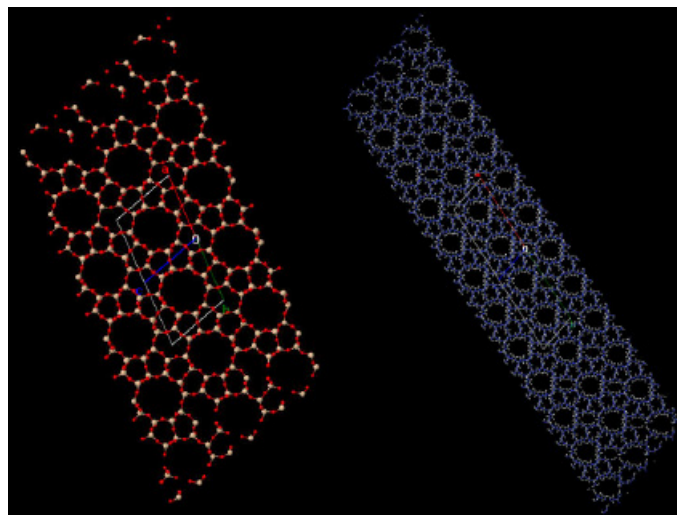

Fig. S3 Zeolite and ZIF forms of MFI topology.

---

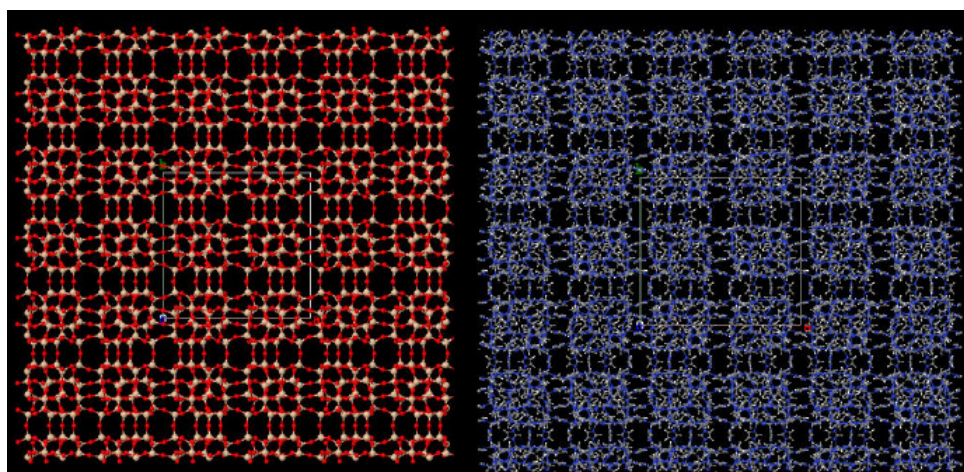

Fig. S4 Zeolite and ZIF forms of RHO topology.

---

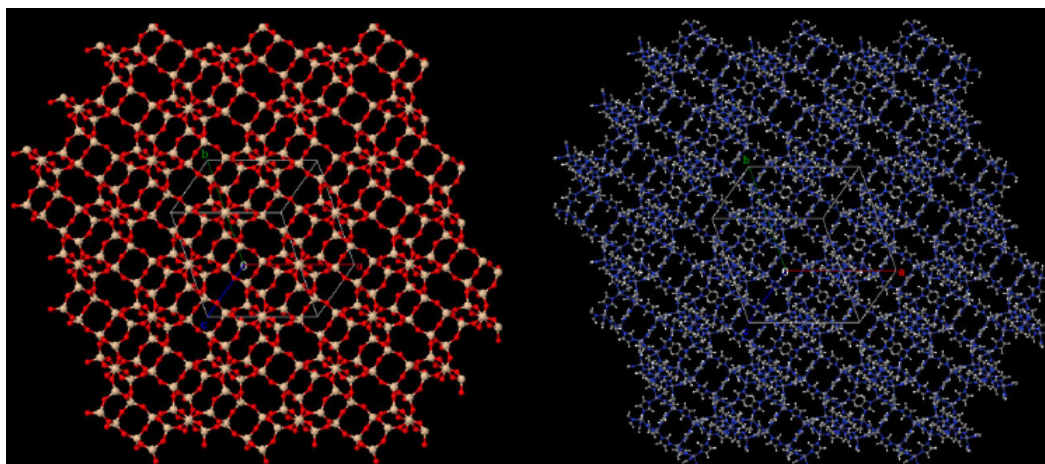

Fig. S5 Geometry and force field parameters of the water molecule for the TIP5P/Ew model.<sup>66</sup>

---

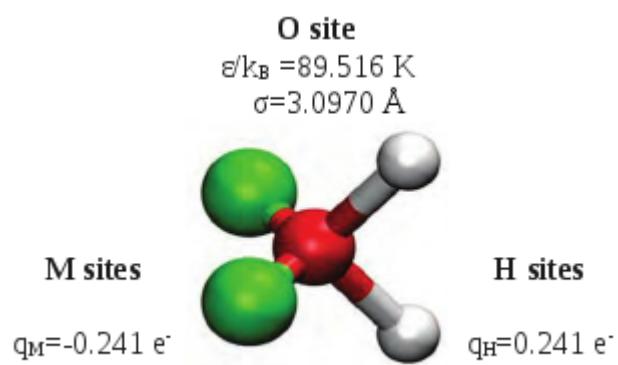

Fig. S6 Pore Size Distributions of the considered structures.

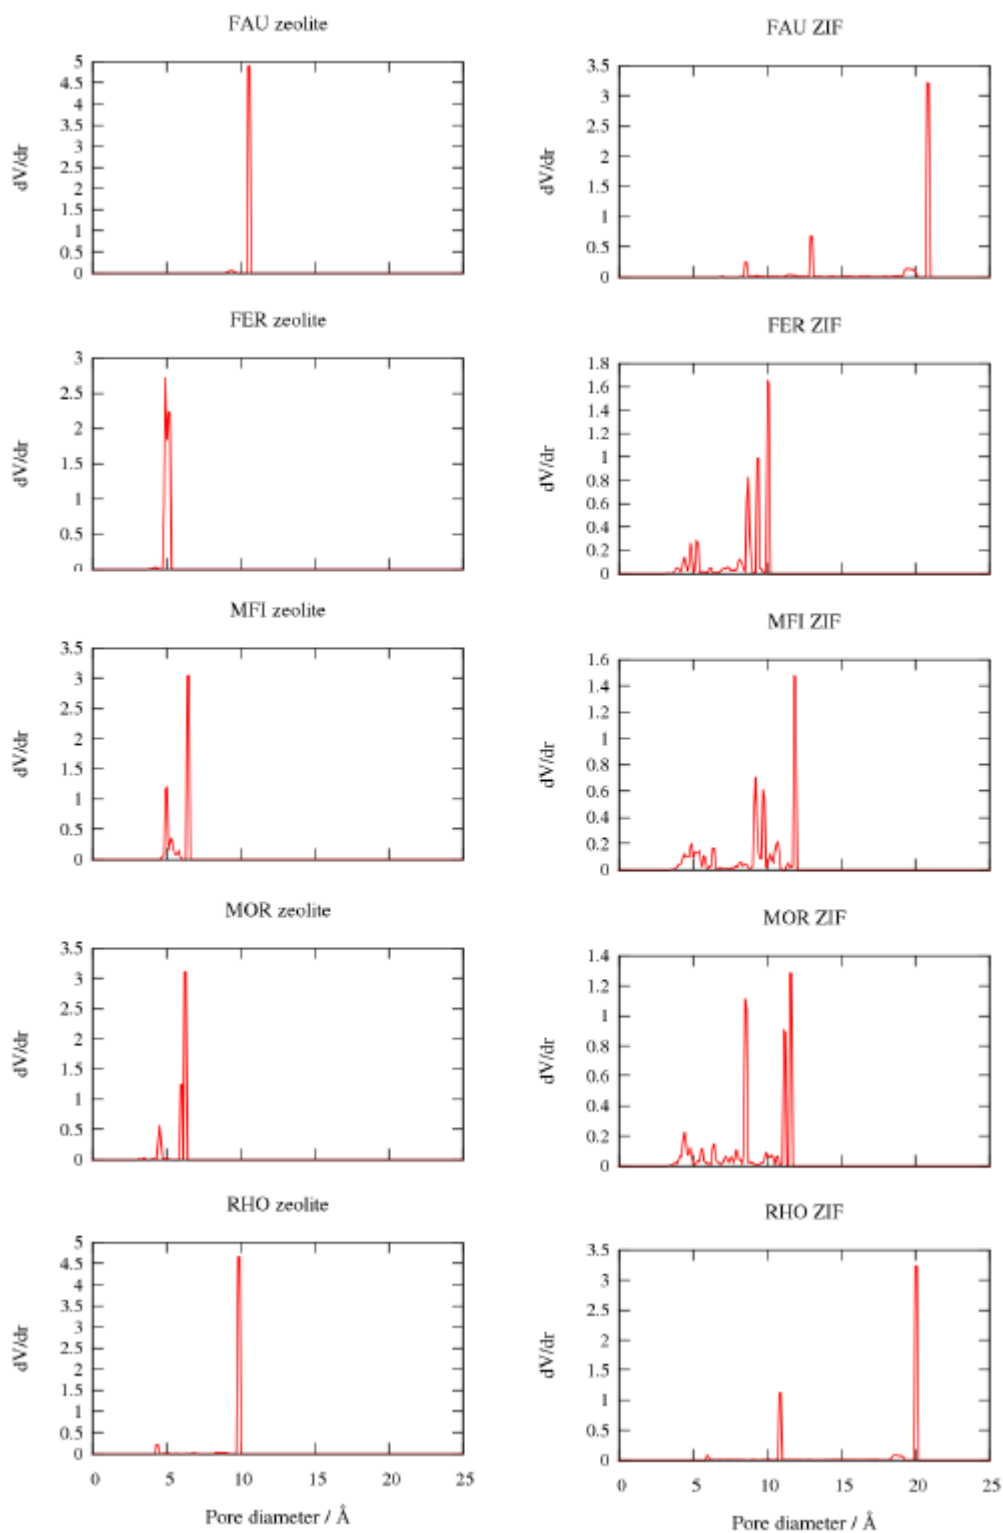

Fig. S7 (a) O-O and (b) O-H Radial Distribution Functions of bulk water at 298.15 K and various values of fugacity.

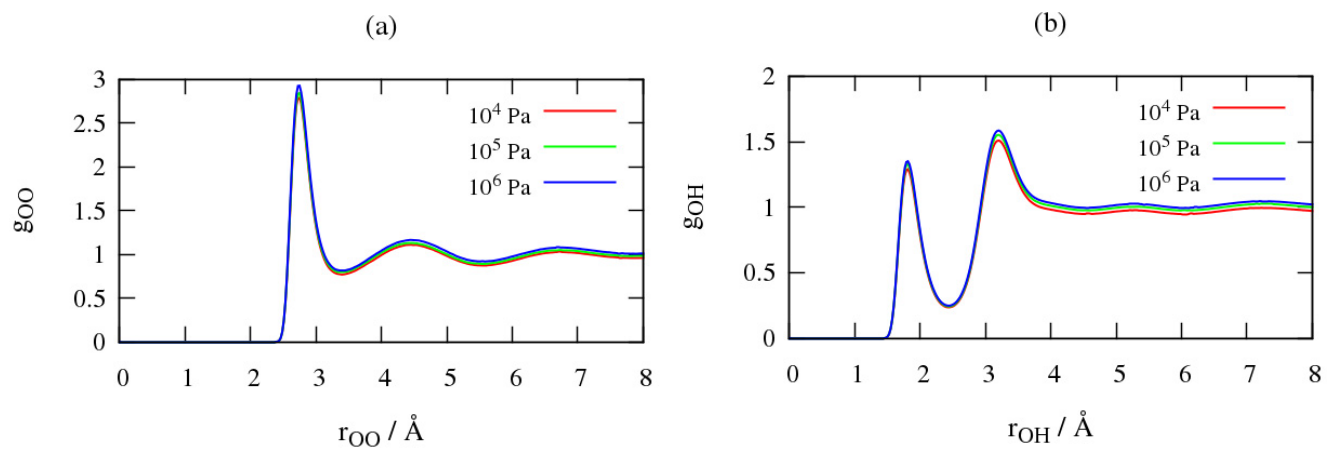



Fig. S8 O-O Radial Distribution Function of water in (a) the zeolites and (b) their ZIF counterparts at 298.15 K for 1 MPa (red), 10MPa (green) and 100 MPa (blue).

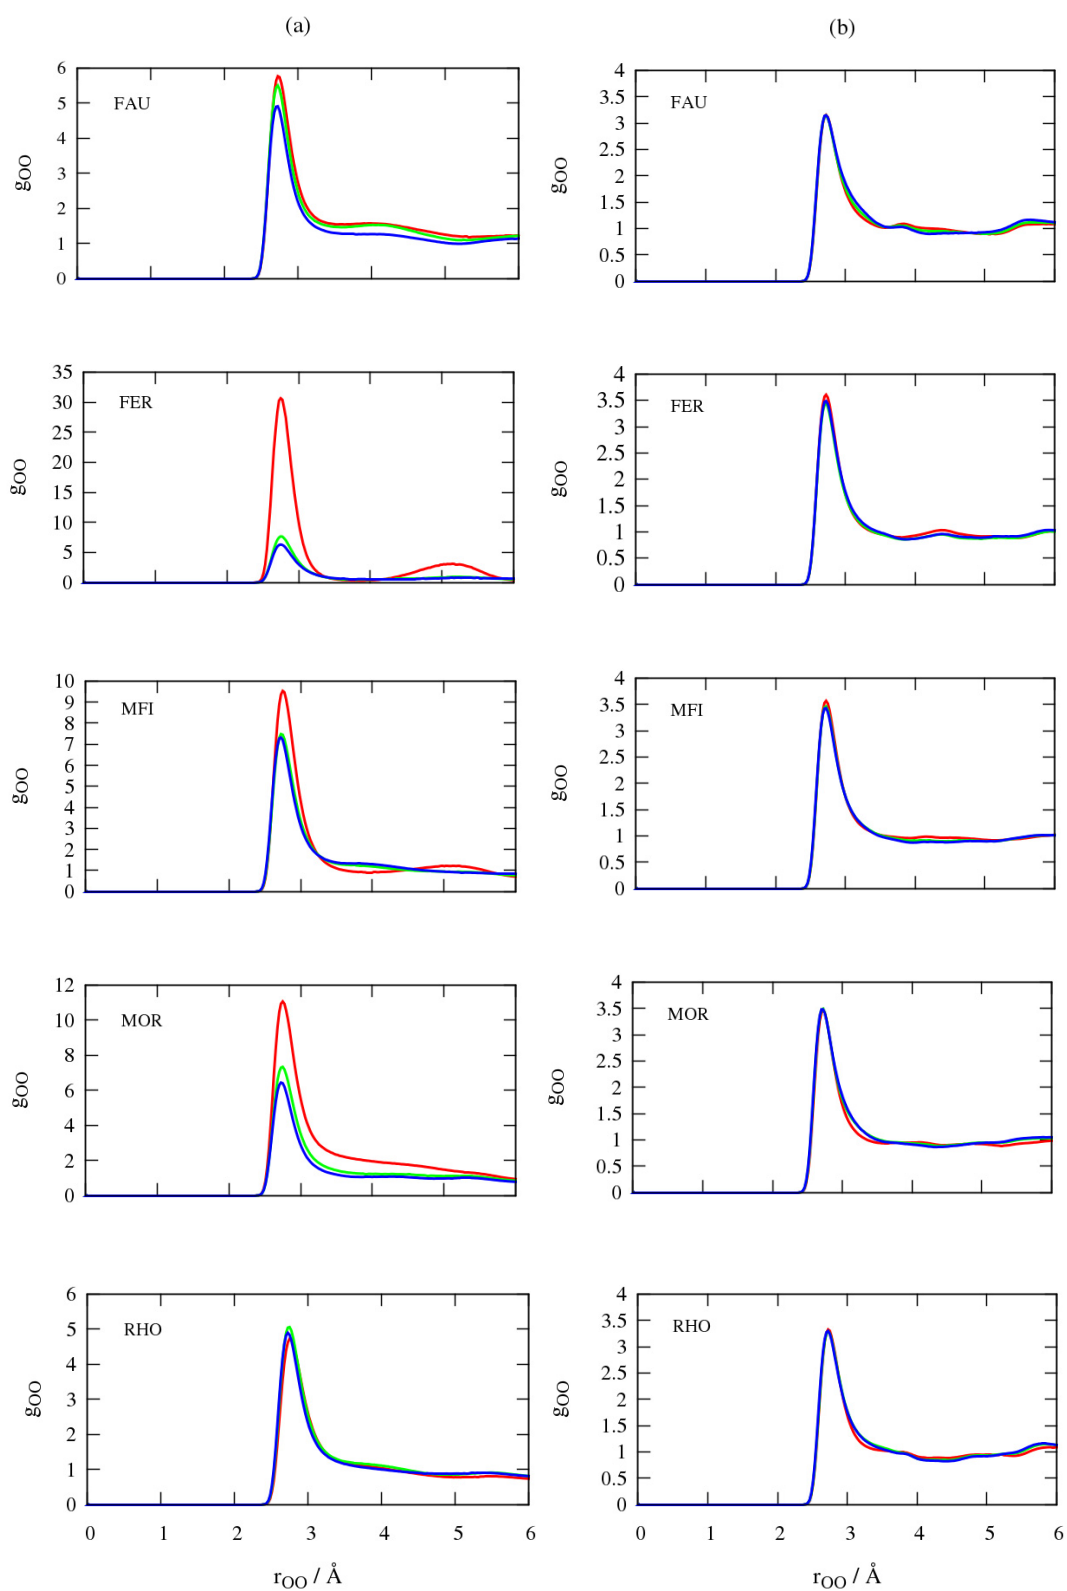

Fig. S9 O-H Radial Distribution Function of water in (a) the zeolites and (b) their ZIF counterparts at 298.15 K for 1 MPa (red), 10MPa (green) and 100 MPa (blue).

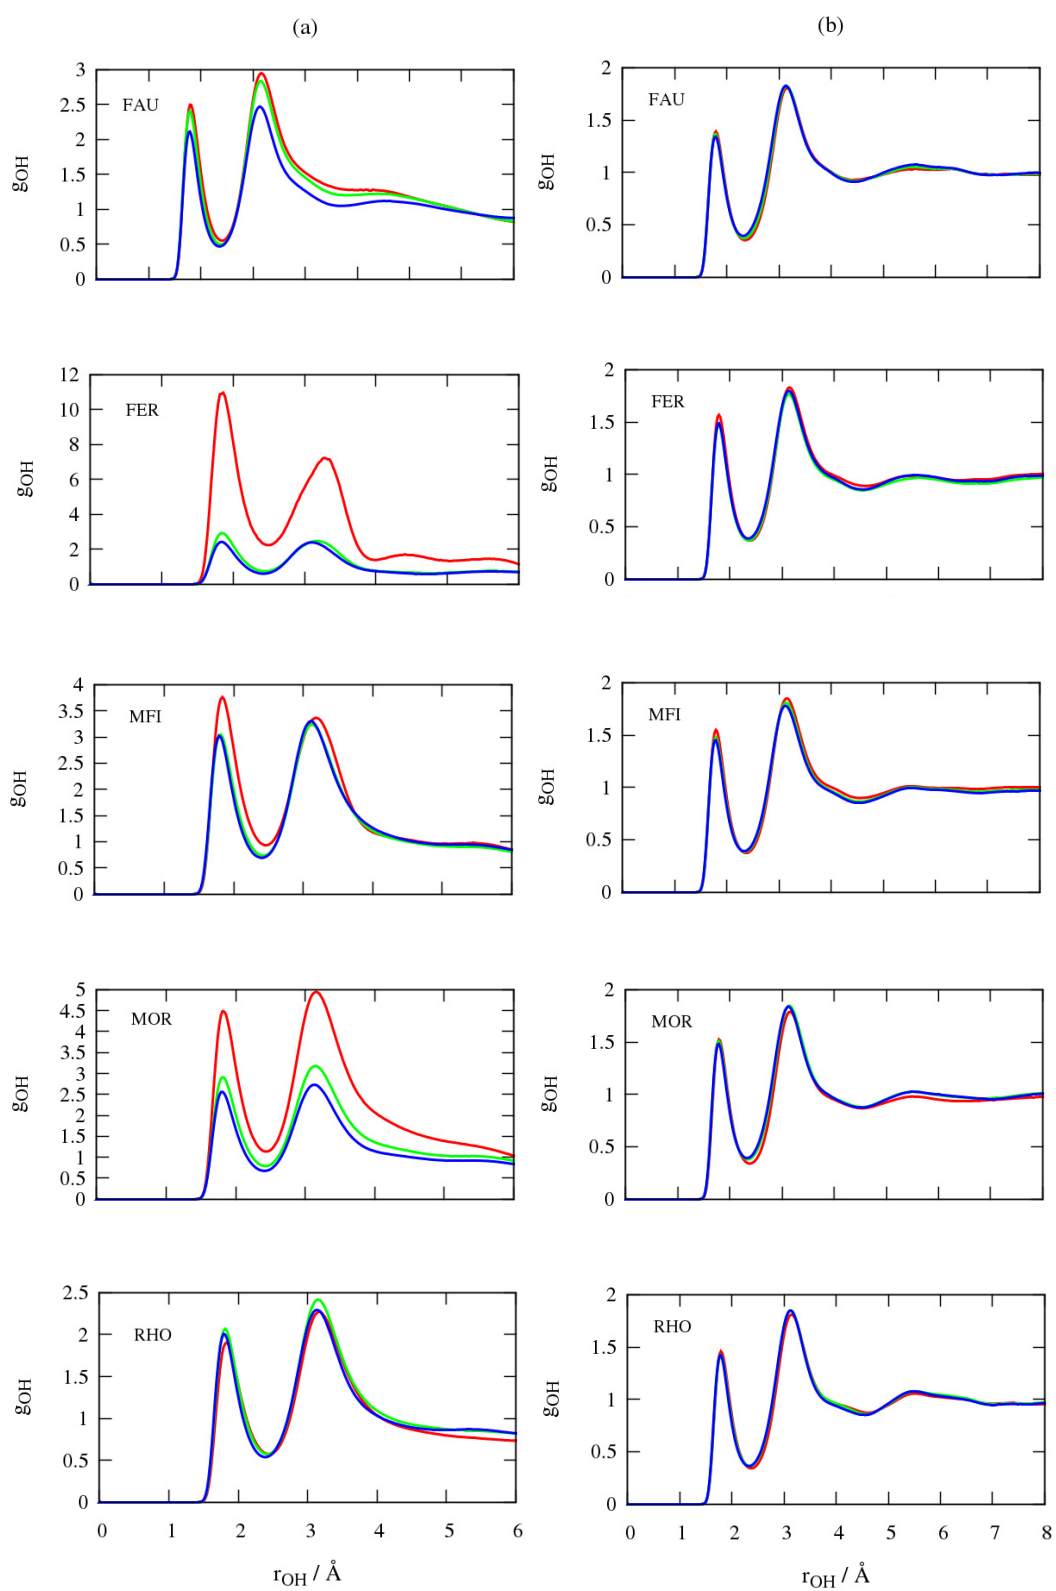

Fig. S10 Cluster size distribution for water in the highly hydrated structures.

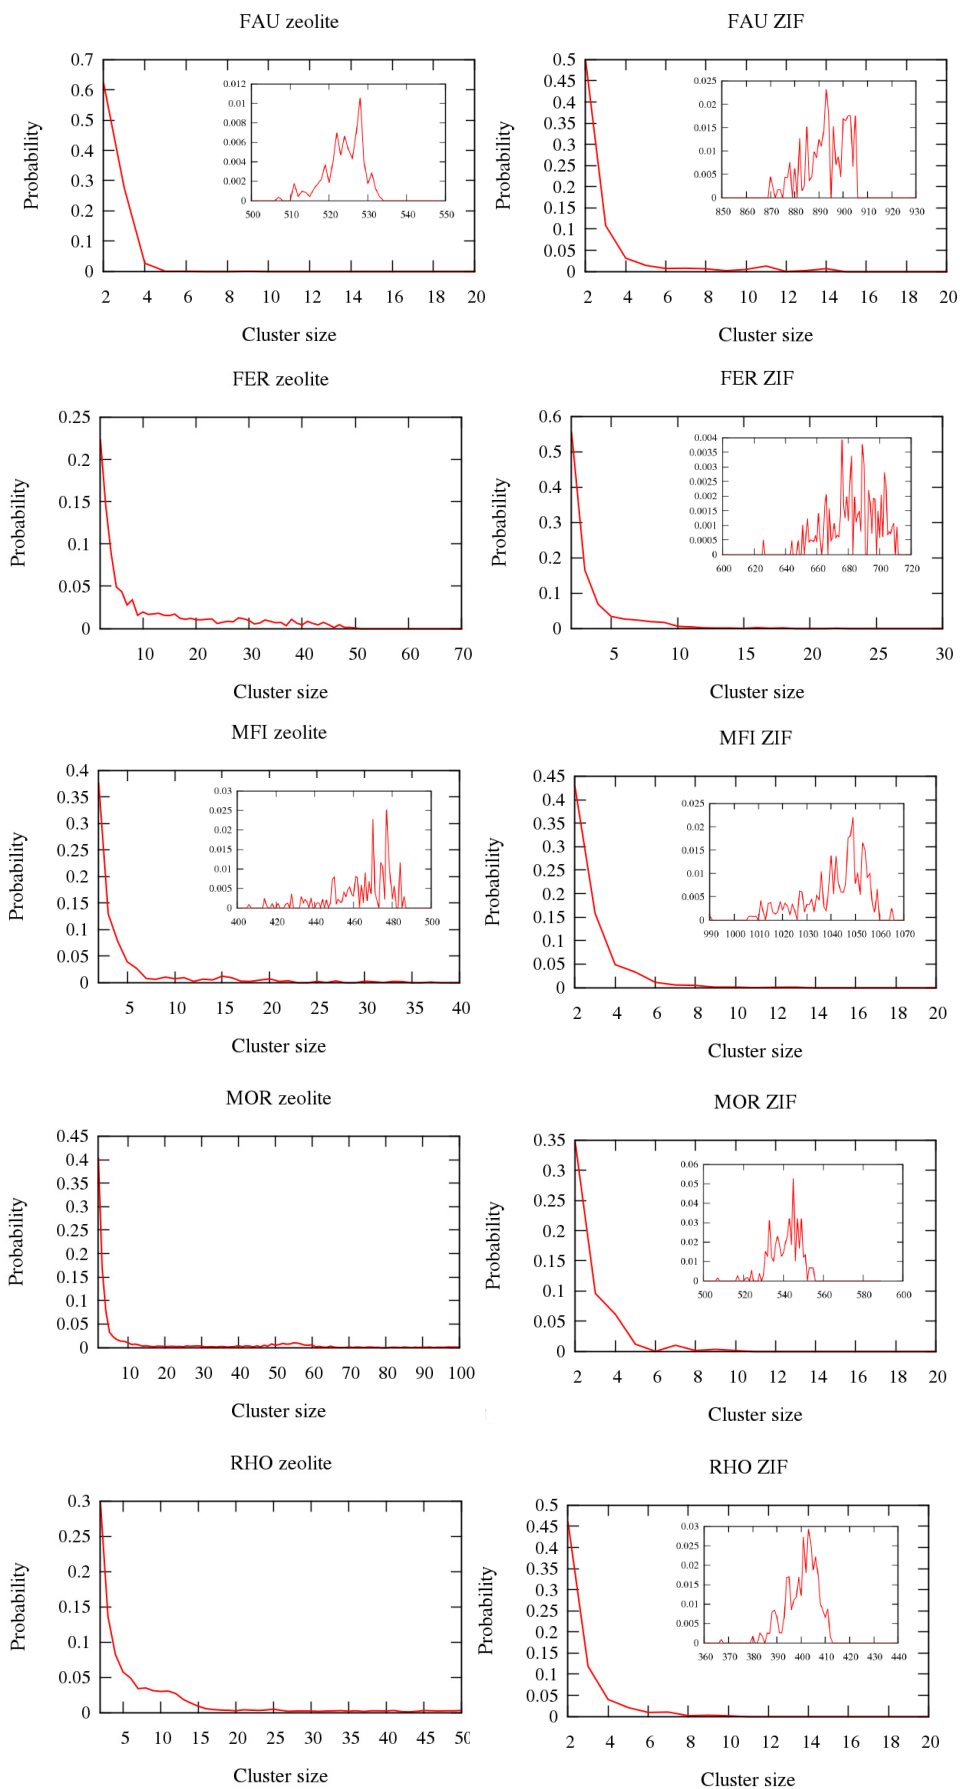

Supplement: c4ra01508h1.pdf [file c4ra01508h1.pdf]
